# Supplementary material
Source: Springer Nature journal article supplement (https://www.springerprofessional.de/resource/supplementary/13677_2013_45_MOESM4_ESM.pdf/10743474)

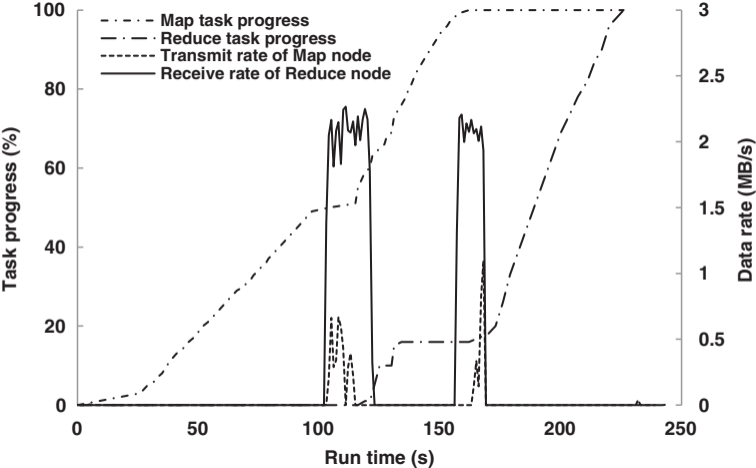

Supplement: MOESM4 [file 10743474]
